# Supplementary material
Source: Springer Nature journal article supplement (https://www.springermedizin.de/resource/supplementary/12889_2012_6696_MOESM1_ESM.pdf/9498840)
Supplement: MOESM1 [file 9498840]

Randomization of 12 churches in Ga-Rankuwa and Soshanguve

Screening church members (40-65 yrs)  
of 12 churches in Ga-Rankuwa and Soshanguve (n=1200)

Risk evaluation based on diabetes risk score, glucose test and blood pressure measurement, and provision of risk score to church members

**Diabetes Score  $\leq 14$ ;  
Normal blood pressure**  
Lifestyle education  
pamphlet (healthy diet  
and exercise benefits)

Pre-hypertension (SBP 120–129 mmHg and/or DBP (80–89 mmHg) and/or pre-diabetes (IFG 6.1–6.9 mmol/L) or both (N=300)

Professional nurse: Blood results for confirmatory diagnosis

Dx Diabetes and/or Hypertension

Specialist care (Dr George Mukhari hospital)

All eligible for core intervention (n=300)

6 churches: intervention (n=150)

6 churches: control (n=150)

Baseline

Questionnaire\* Health exam\* Biochemical\*\*

Intervention

Five group sessions

Lifestyle education pamphlet (healthy diet and exercise benefits)

6 months

Questionnaire\* Health exam\*

Intervention

One follow-up session

12 months

Questionnaire\* Health exam\* Biochemical\*\*

24 months

Questionnaire\* Health exam\* Biochemical\*\*

36 months

Questionnaire\* Health exam\* Biochemical\*\*

\*done by health promoter; \*\*conducted by professional nurse
